# Supplementary material
Source: PubMed Central journal article supplement (PMC3225123)

## Report

# Condensin Function in Mitotic Nucleolar Segregation is Regulated by rDNA Transcription

**Bi-Dar Wang**

**Pavel Butylin**

**Alexander Strunnikov\***

NICHD; Laboratory of Gene Regulation and Development; Bethesda, Maryland USA

\*Correspondence to: Alexander V. Strunnikov; NIH, NICHD, LGRD; 18T Library Drive, Room 106; Bethesda, Maryland 20892 USA; Tel.: 301.402.8384; Fax: 301.402.1323; Email: [strunnik@mail.nih.gov](mailto:strunnik@mail.nih.gov)

Original manuscript submitted: 08/15/06

Manuscript accepted: 08/17/06

This manuscript has been published online, prior to printing for Cell Cycle, Volume 5, Issue 19. Definitive page numbers have not been assigned. The current citation is: Cell Cycle 2006; 5(19):

<http://www.landesbioscience.com/journals/cc/abstract.php?id=3292>

Once the issue is complete and page numbers have been assigned, the citation will change accordingly.

## KEY WORDS

condensin, nucleolus, transcription, chromosome segregation, chromosome condensation, RFB, FOB1

## ACKNOWLEDGEMENTS

We thank M. Nomura, T. Kobayashi, S. Roeder and S. Liebman for strains and plasmids; Michael Lichten and A. Hinnebusch for critical reading of the manuscript; K. Bloom and A. Arnaoutov for time-lapse microscopy advice; R. Mehta and J. Panebianco for technical help. This research was supported by the Intramural Research Program of the NIH at the NICHD and at the Center for Cancer Research, NCI.

## SUPPLEMENTARY MATERIAL

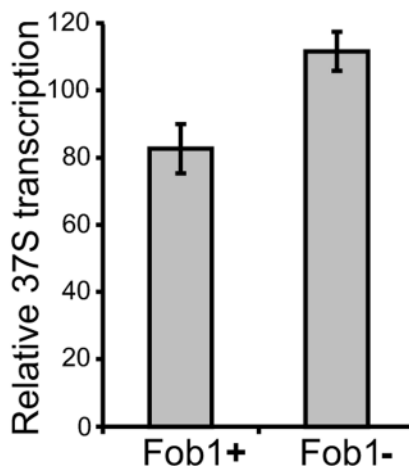

Supplement: NIHMS101684-supplement-1.pdf [file NIHMS101684-supplement-1.pdf]
